# Supplementary material for: Computational Identification of ECT2 as a Potential Pan-Cancer Biomarker and Therapeutic Target Through Integrated Genomic Data Analysis
Source: Research Square preprint supplement (doi:10.21203/rs.3.rs-5687415/v1), 2025-01-02
Supplement: Supplementary file 1 [file bfa0a57fc793598755227a41.docx]

**Supplementary figures**

**
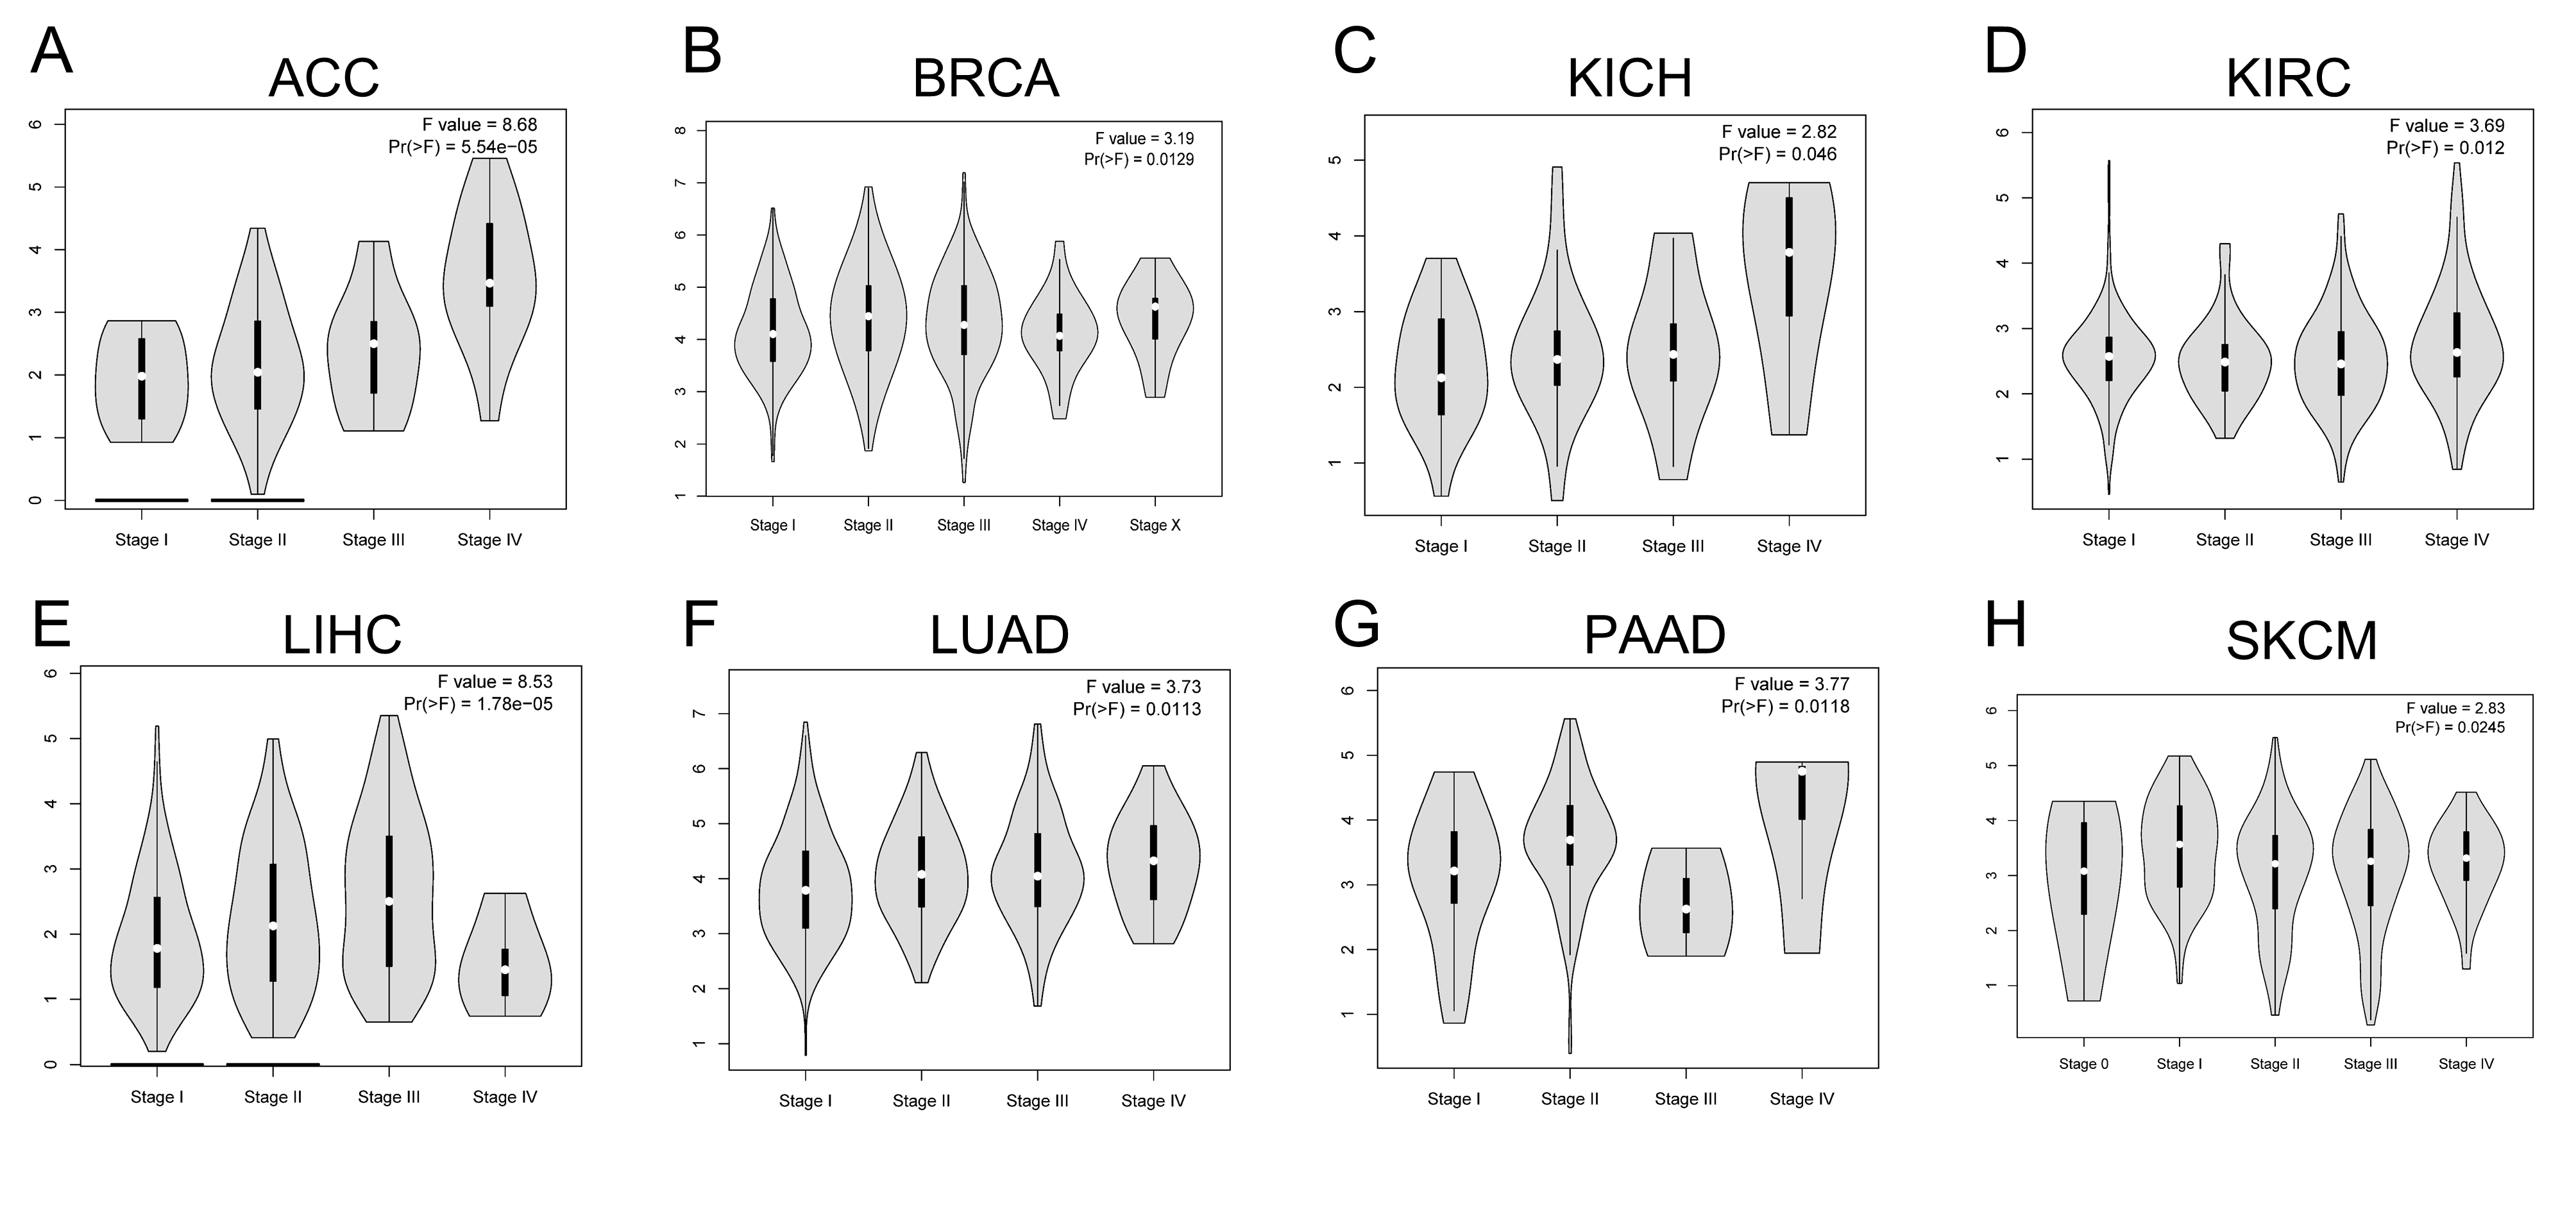
**

**Supplementary figure 1.** Correlations between the ECT2 expression and tumor stage are significantly in (A)ACC; (B)BRCA; (C)KICH; (D)KIRC; (E)LIHC; (F)LUAD; (G)PAAD; (H)SKCM.

**
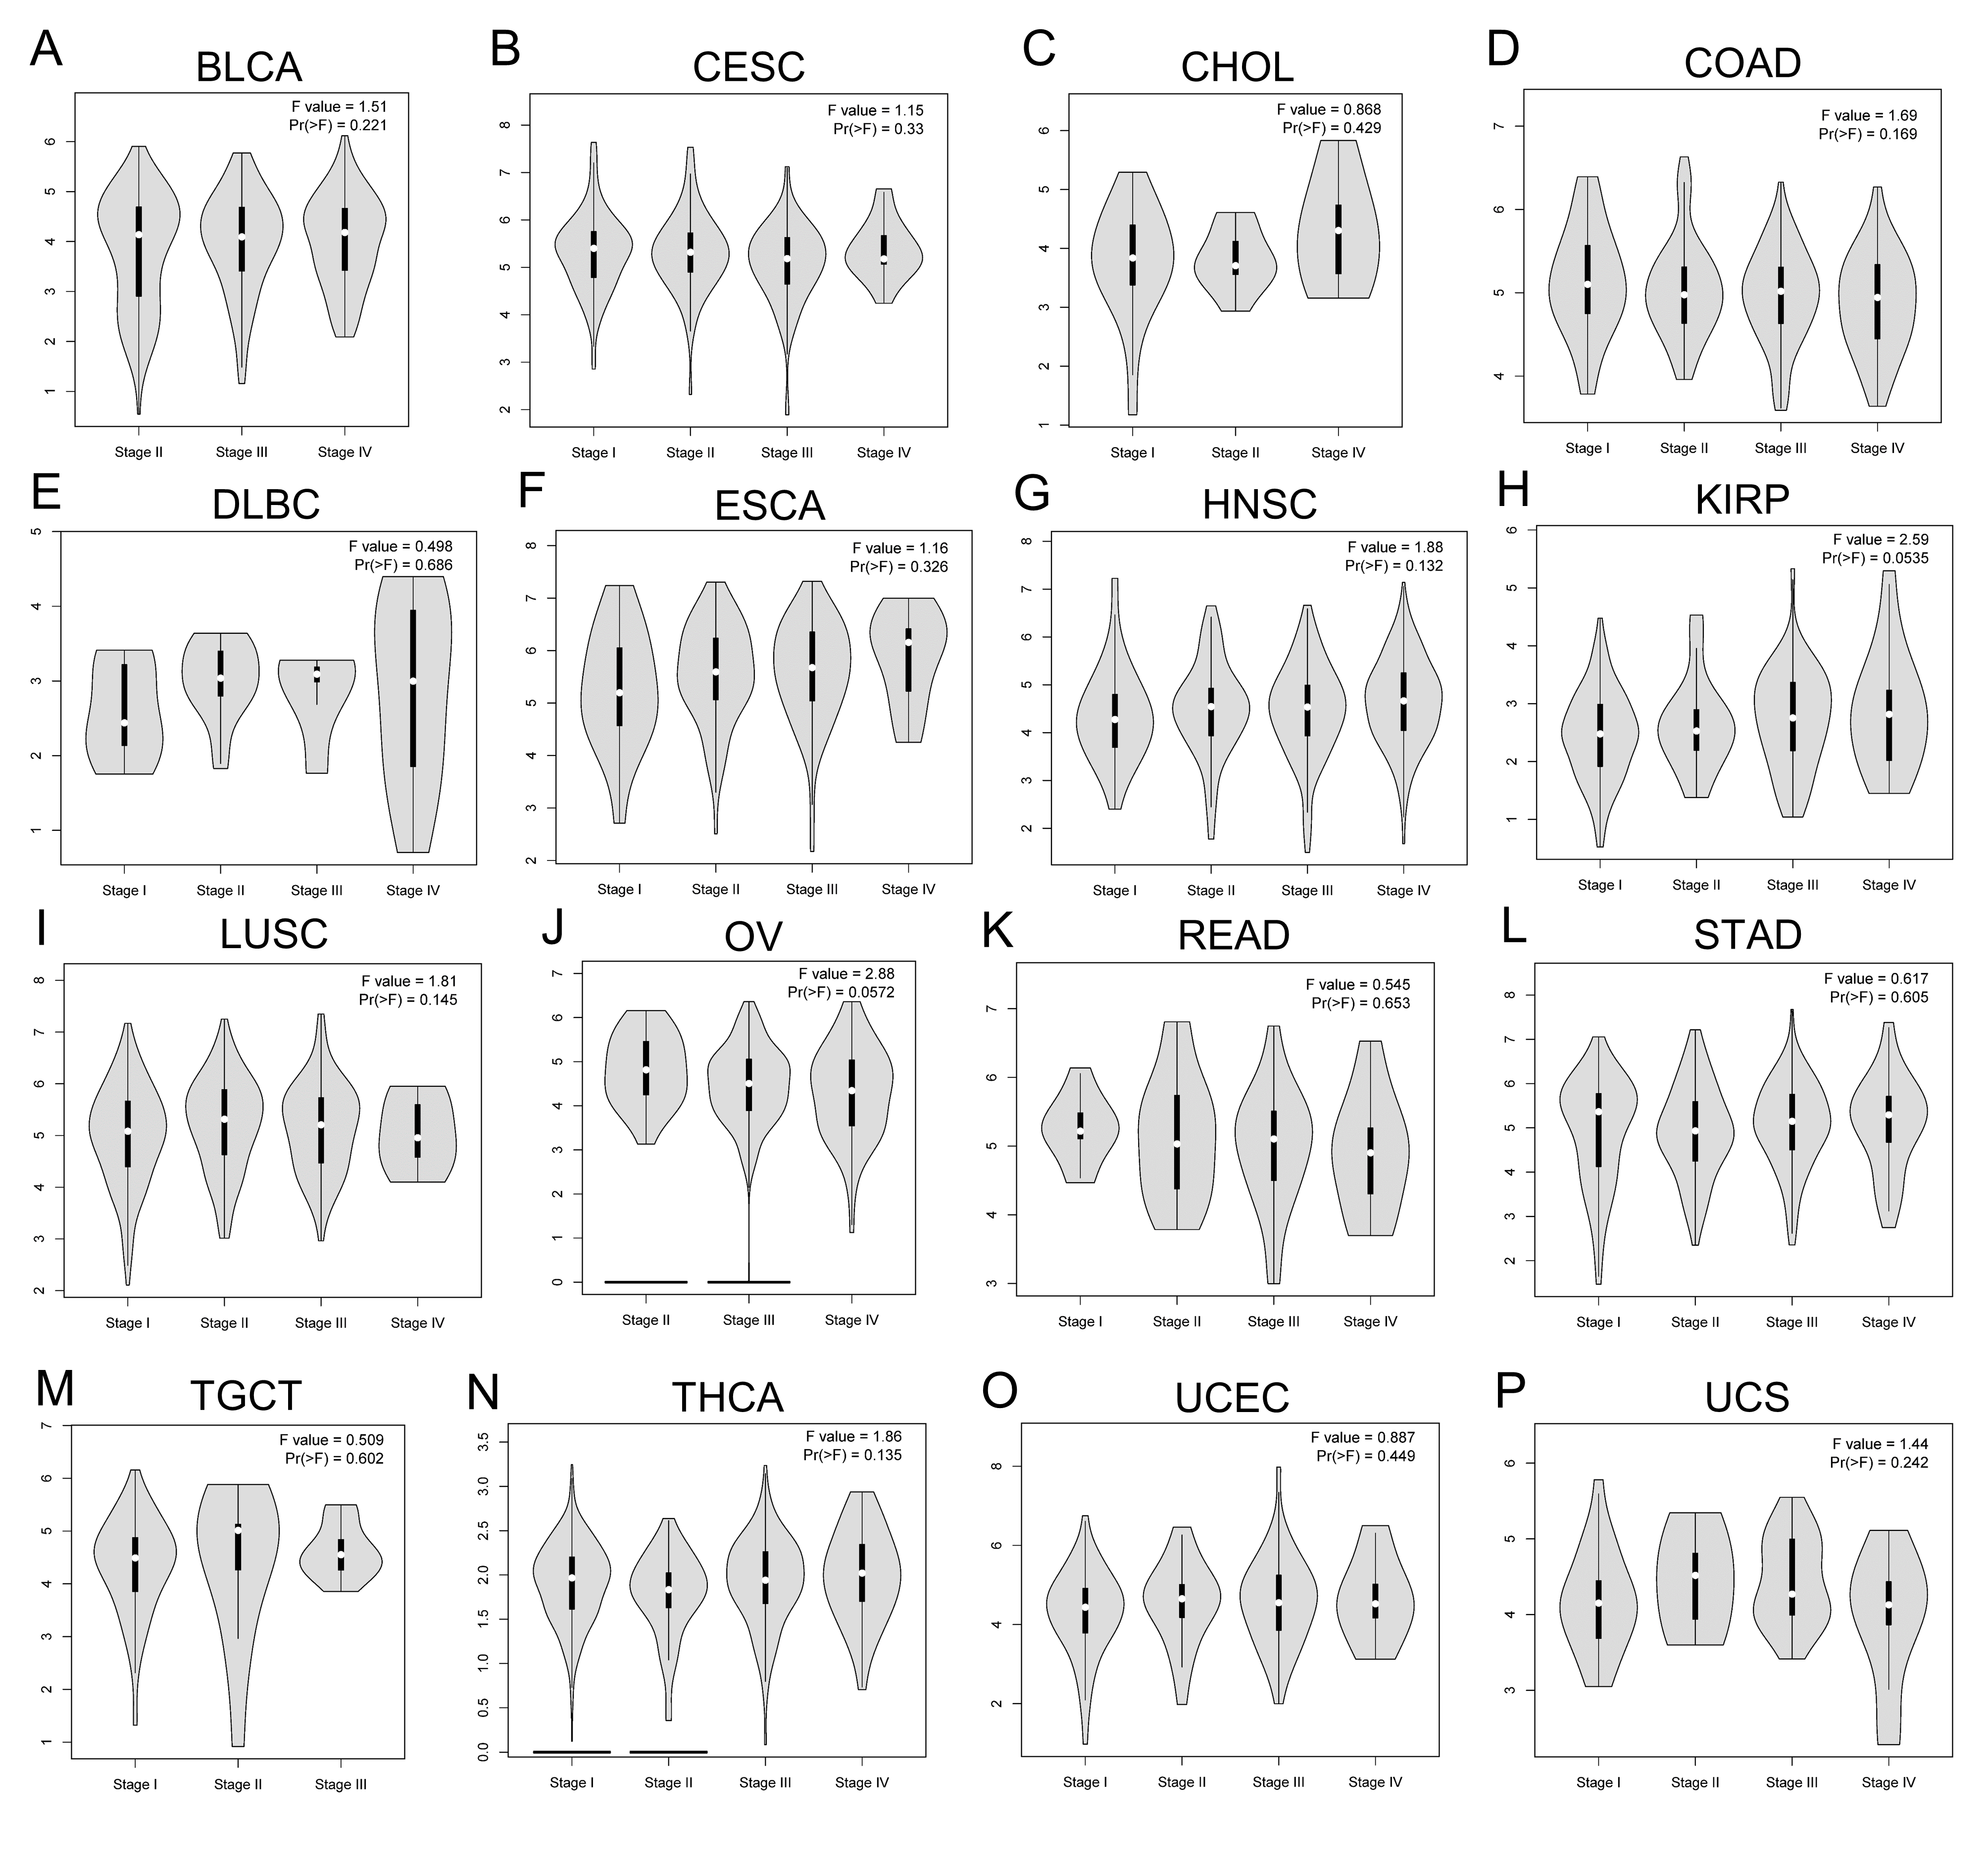
**

**Supplementary figure 2.** ECT2 expression and tumor stage are showing no correlation in following cancers .

(A)BLCA; (B)CESC; (C)CHOL; (D)COAD; (E)DLBC; (F)ESCA; (G)HNSC; (H)KIRP; (I)LUSC; (J)OV; (K)READ; (L)STAD; (M)TGCT; (N)THCA; (O)UCEC; (P)UCS.

**
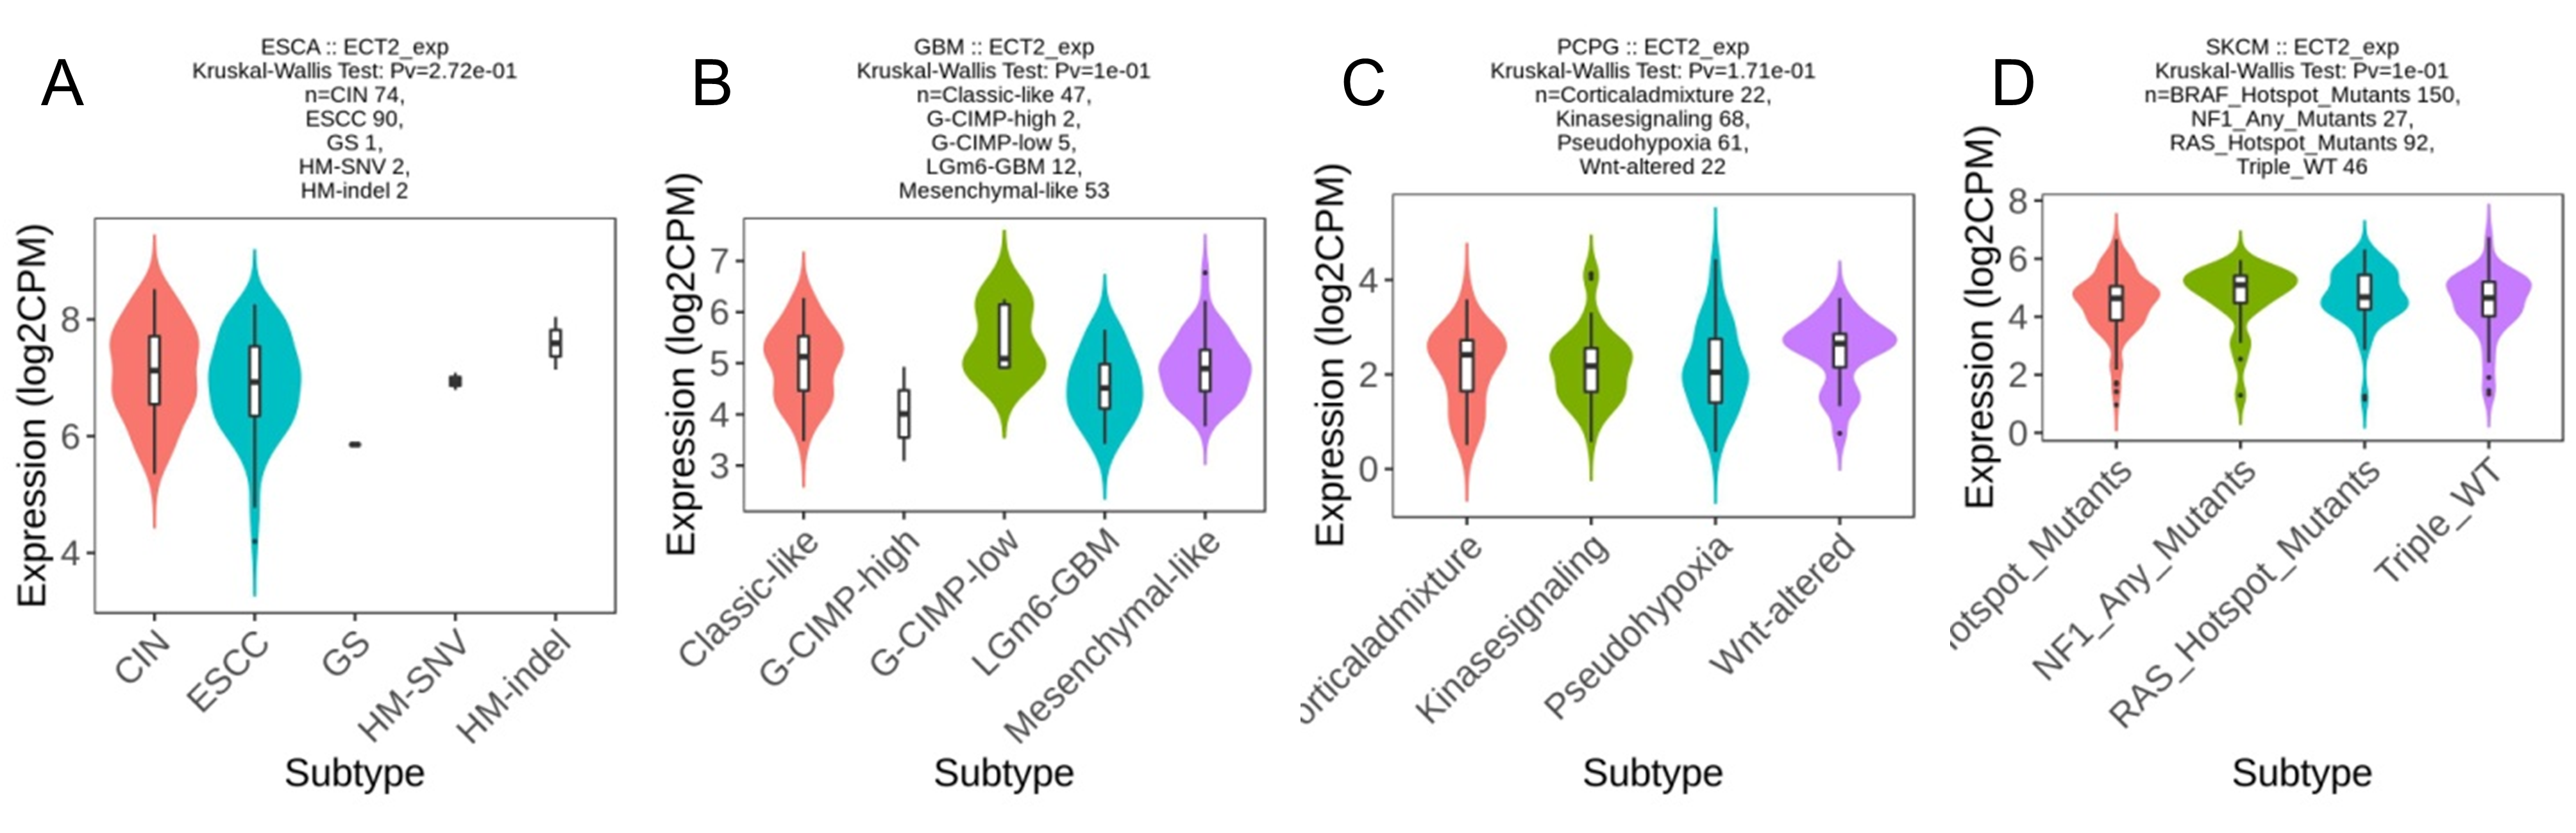
**

**Supplementary figure 3.** Correlations between ECT2 expression and molecular subtypes.

(A)ESCA; (B)GBM; (C)PCPG; (D)SKCM.

**
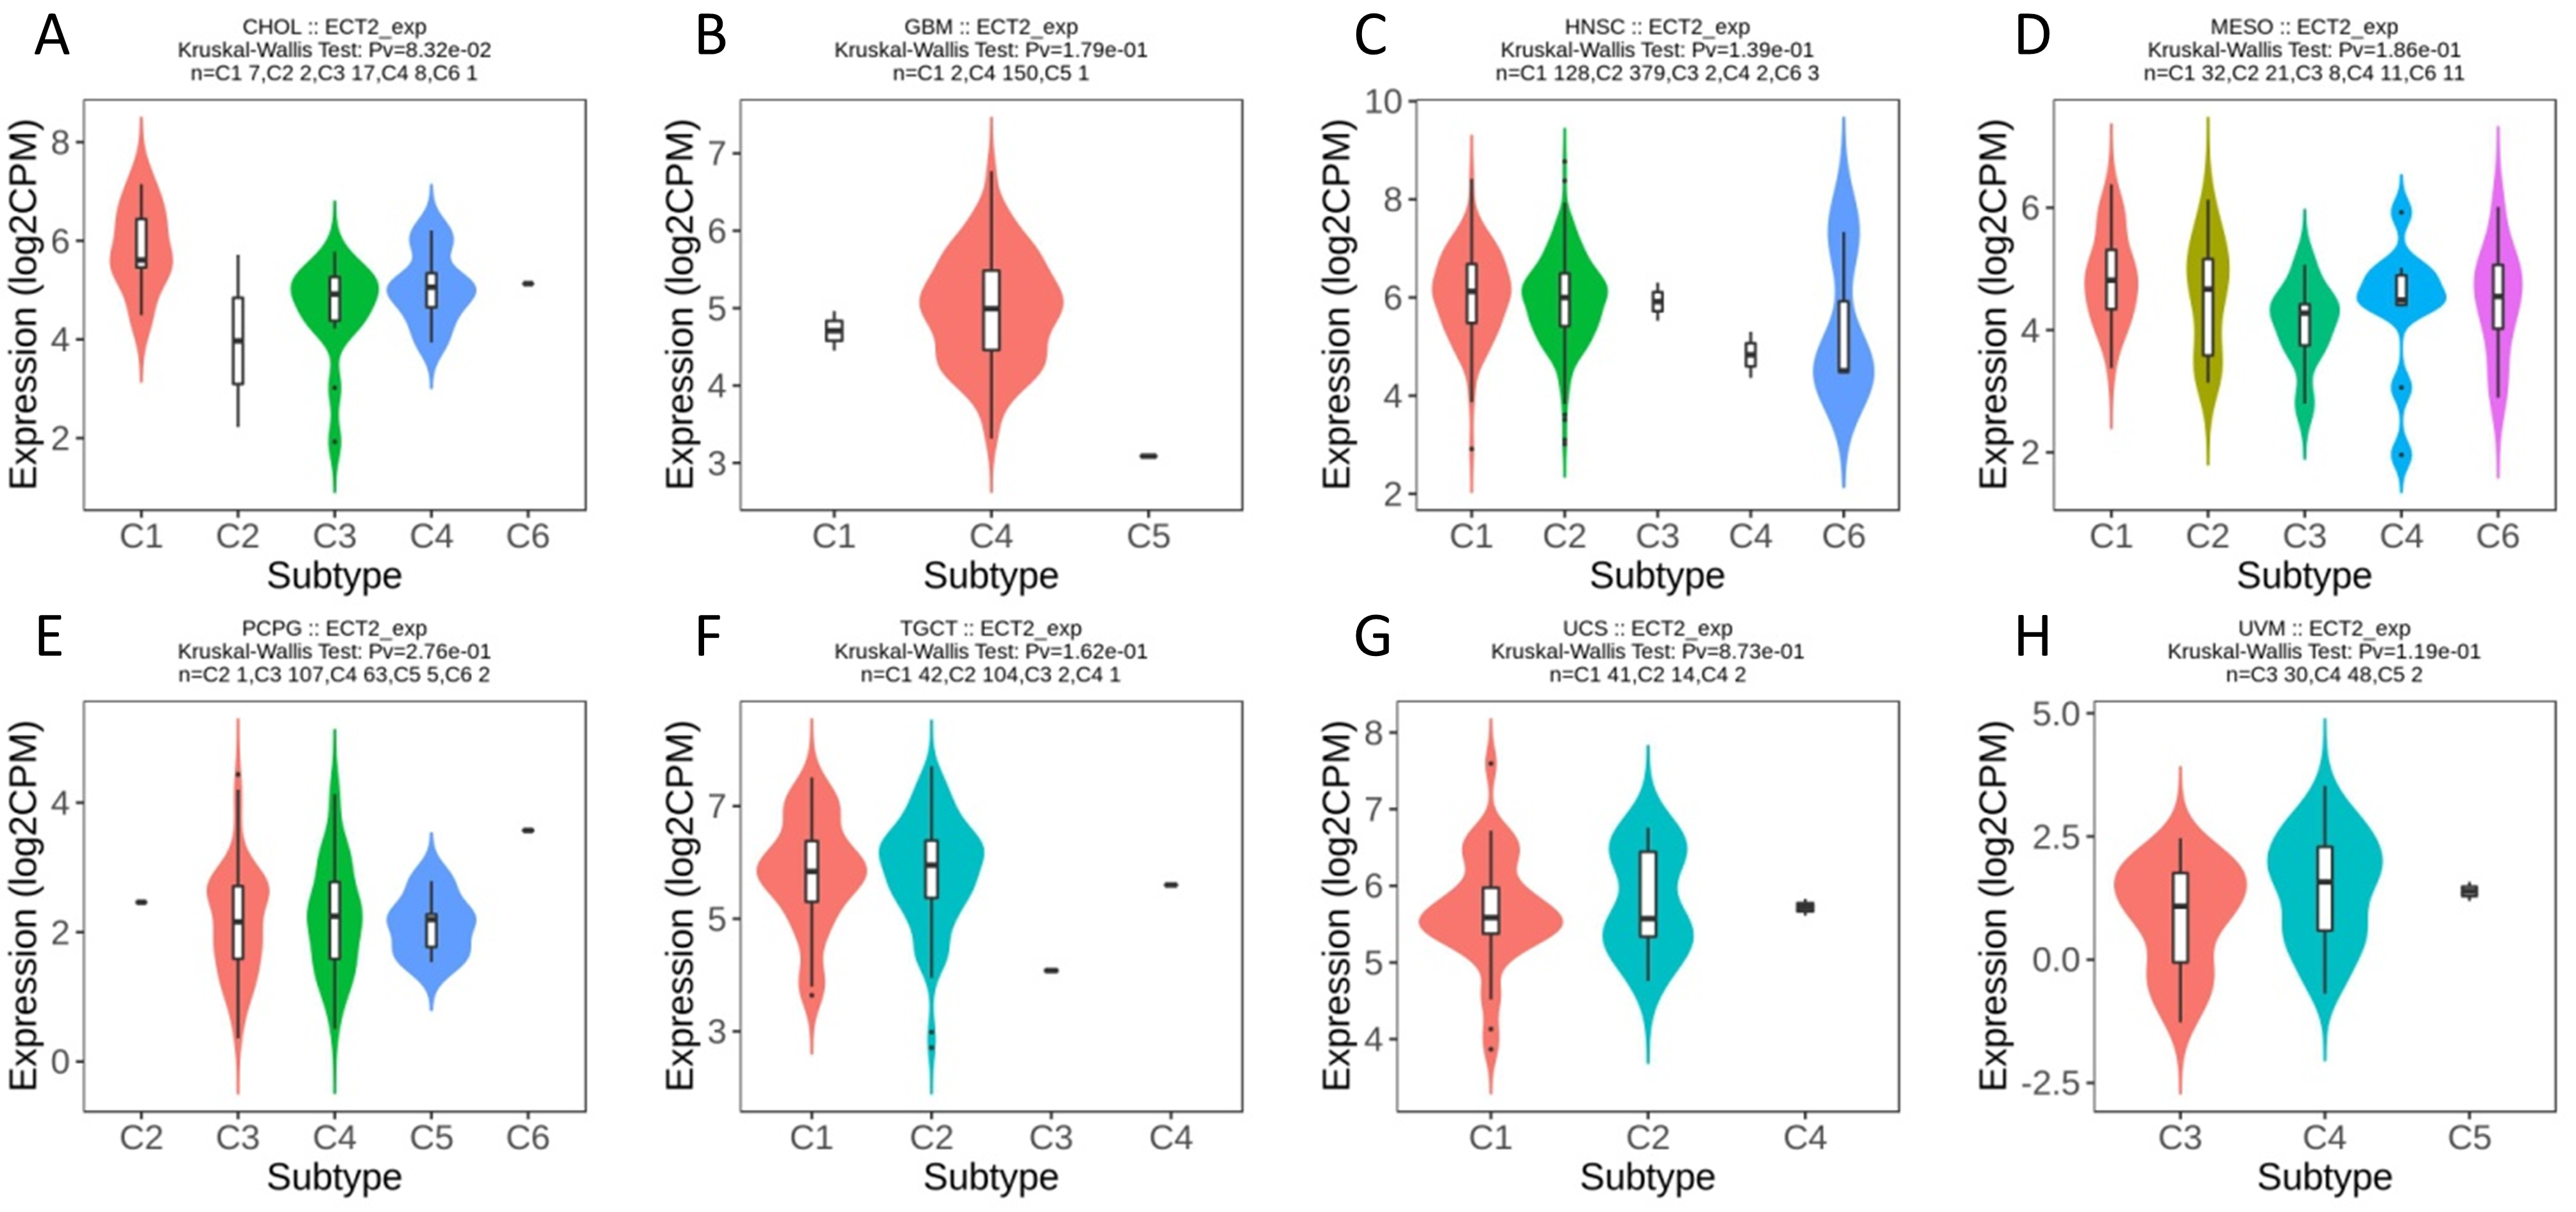
**

**Supplementary figure 4.** Correlations between ECT2 expression and immune subtypes.

(A) CHOL; (B)GBM; (C)HNSC; (D)MESO; (E)PCPG; (F)TGCT; (G)UCS; (H)UVM.

**
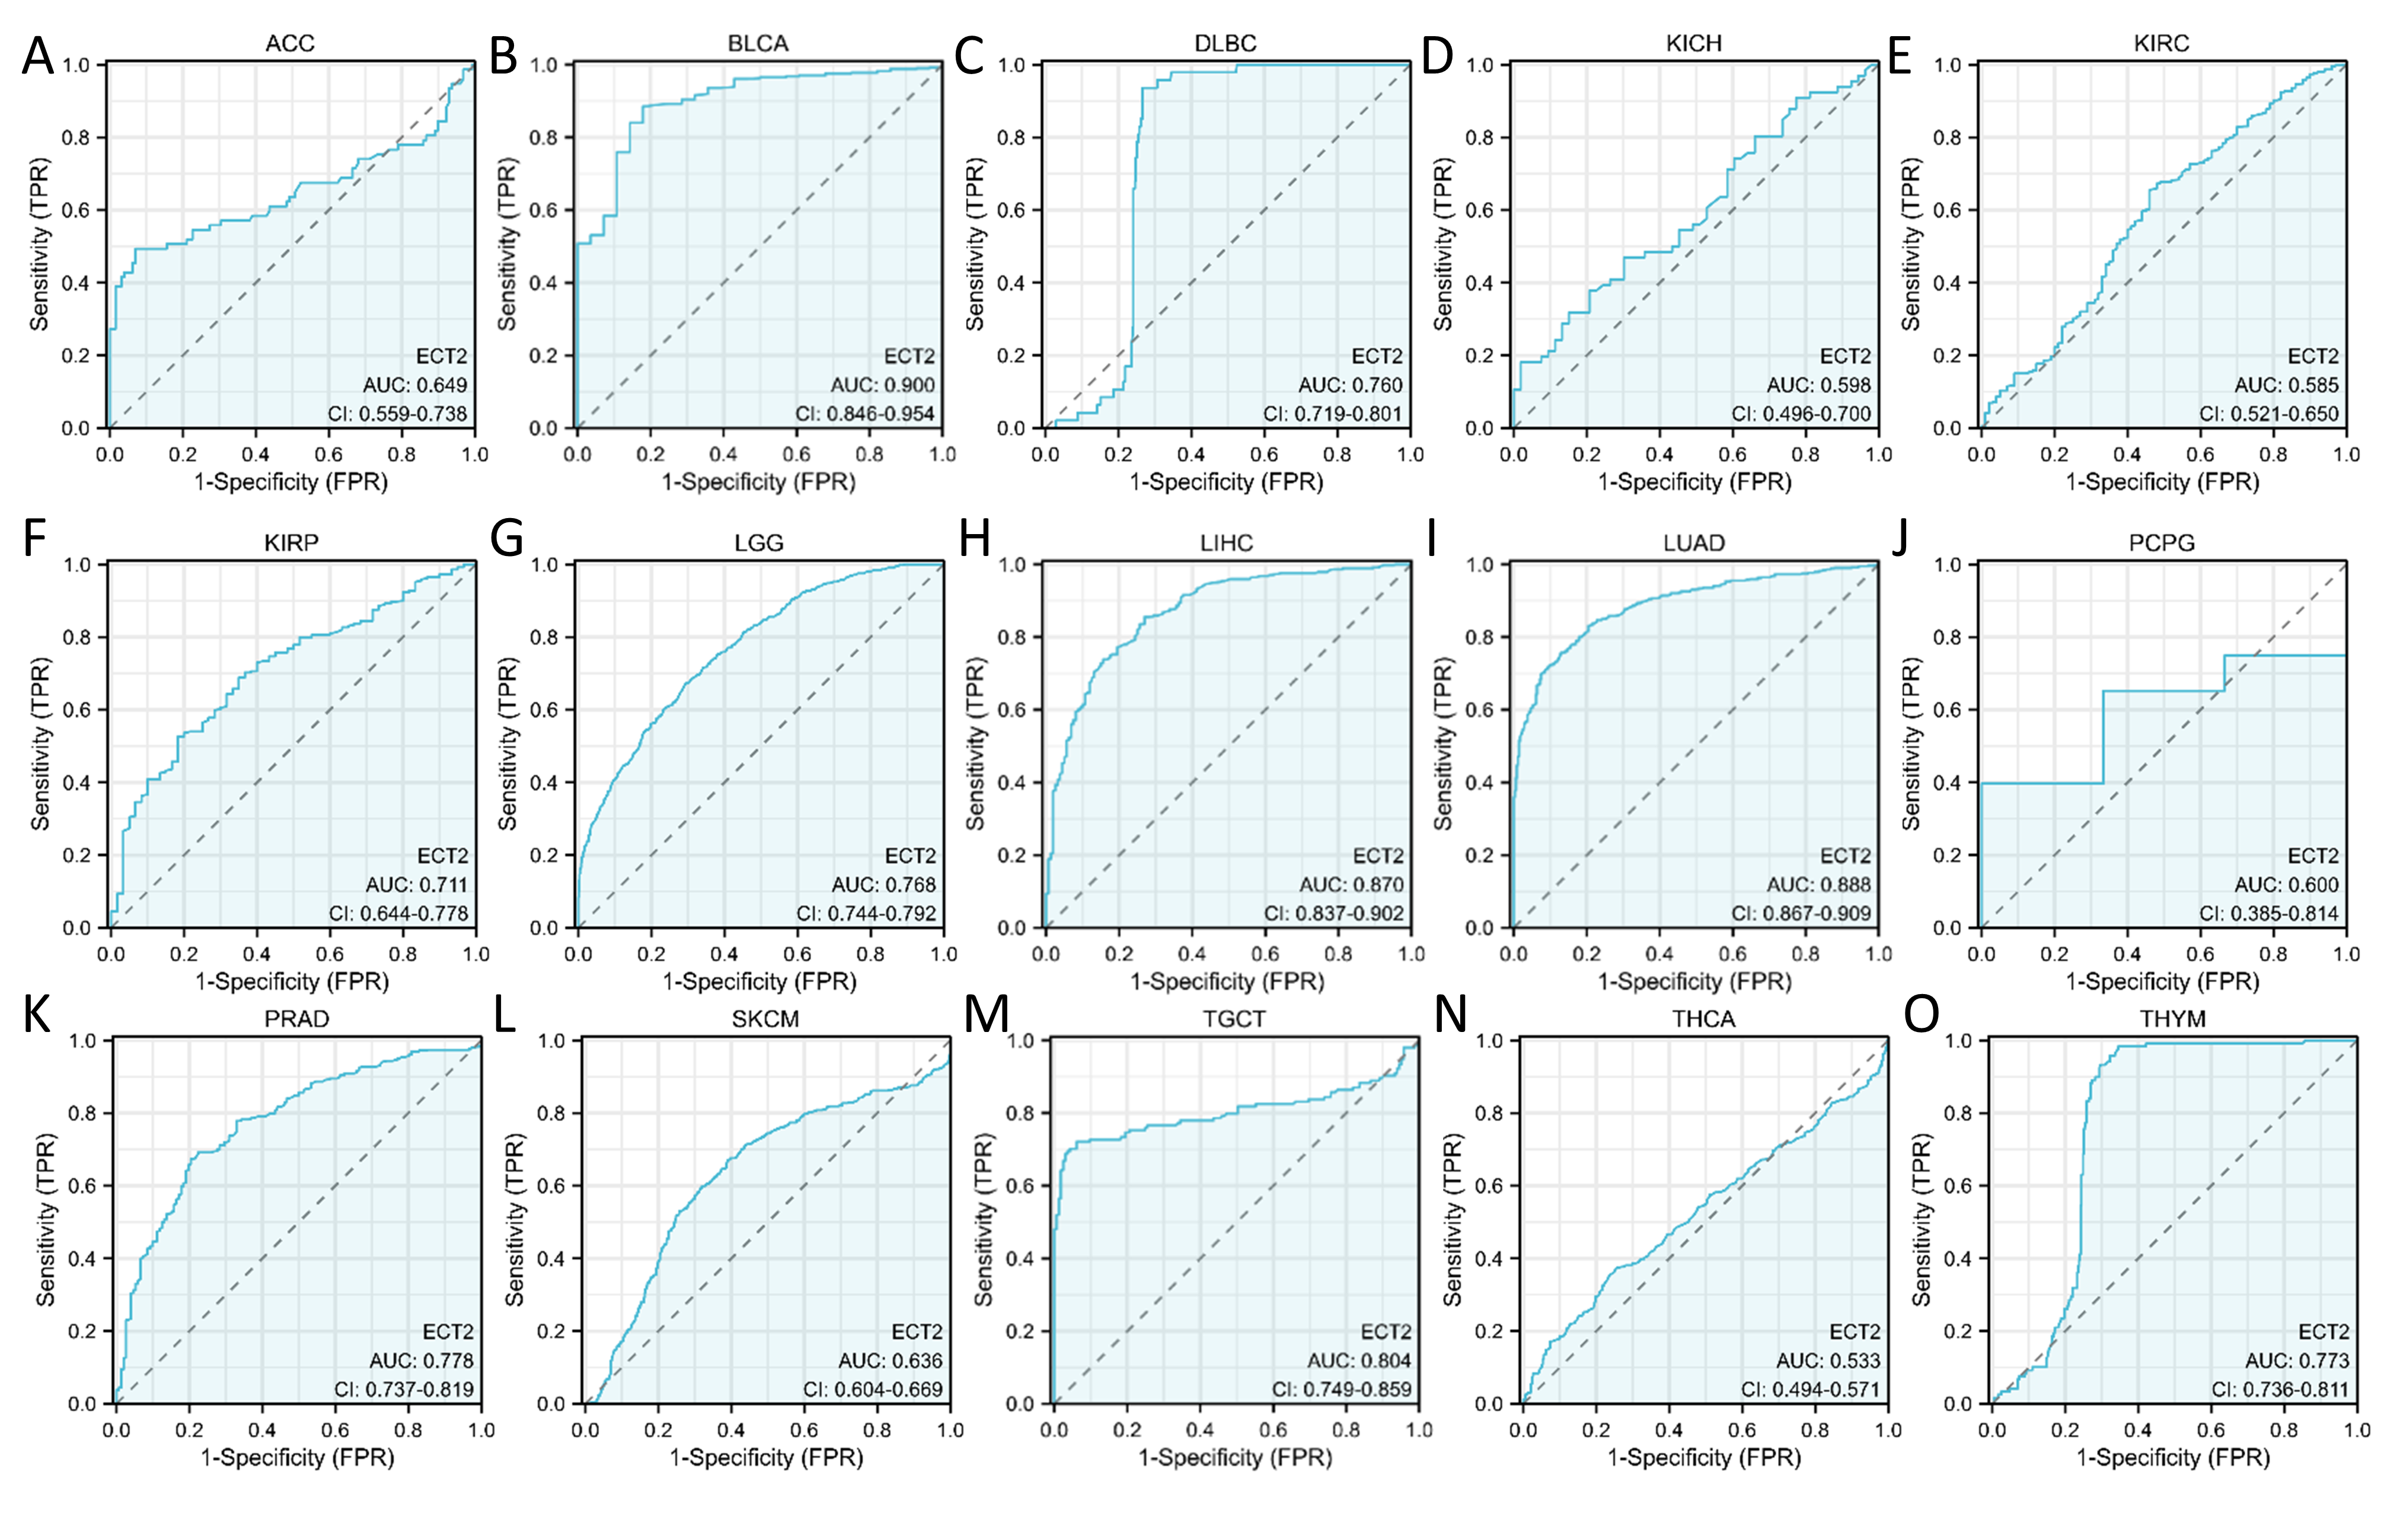
**

**Supplementary figure 5.** Receiver operating characteristic (ROC) curve for ECT2 expression in pan-cancer.

(A) ACC; (B) BLCA; (C) DLBC; (D) KICH; (E) KIRC; (F) KIRP; (G)LGG; (H)LIHC; (I)LUAD; (J) PCPG; (K) PRAD; (L) SKCM; (M)TGCT; (N)THCA; (O)THYM.

**
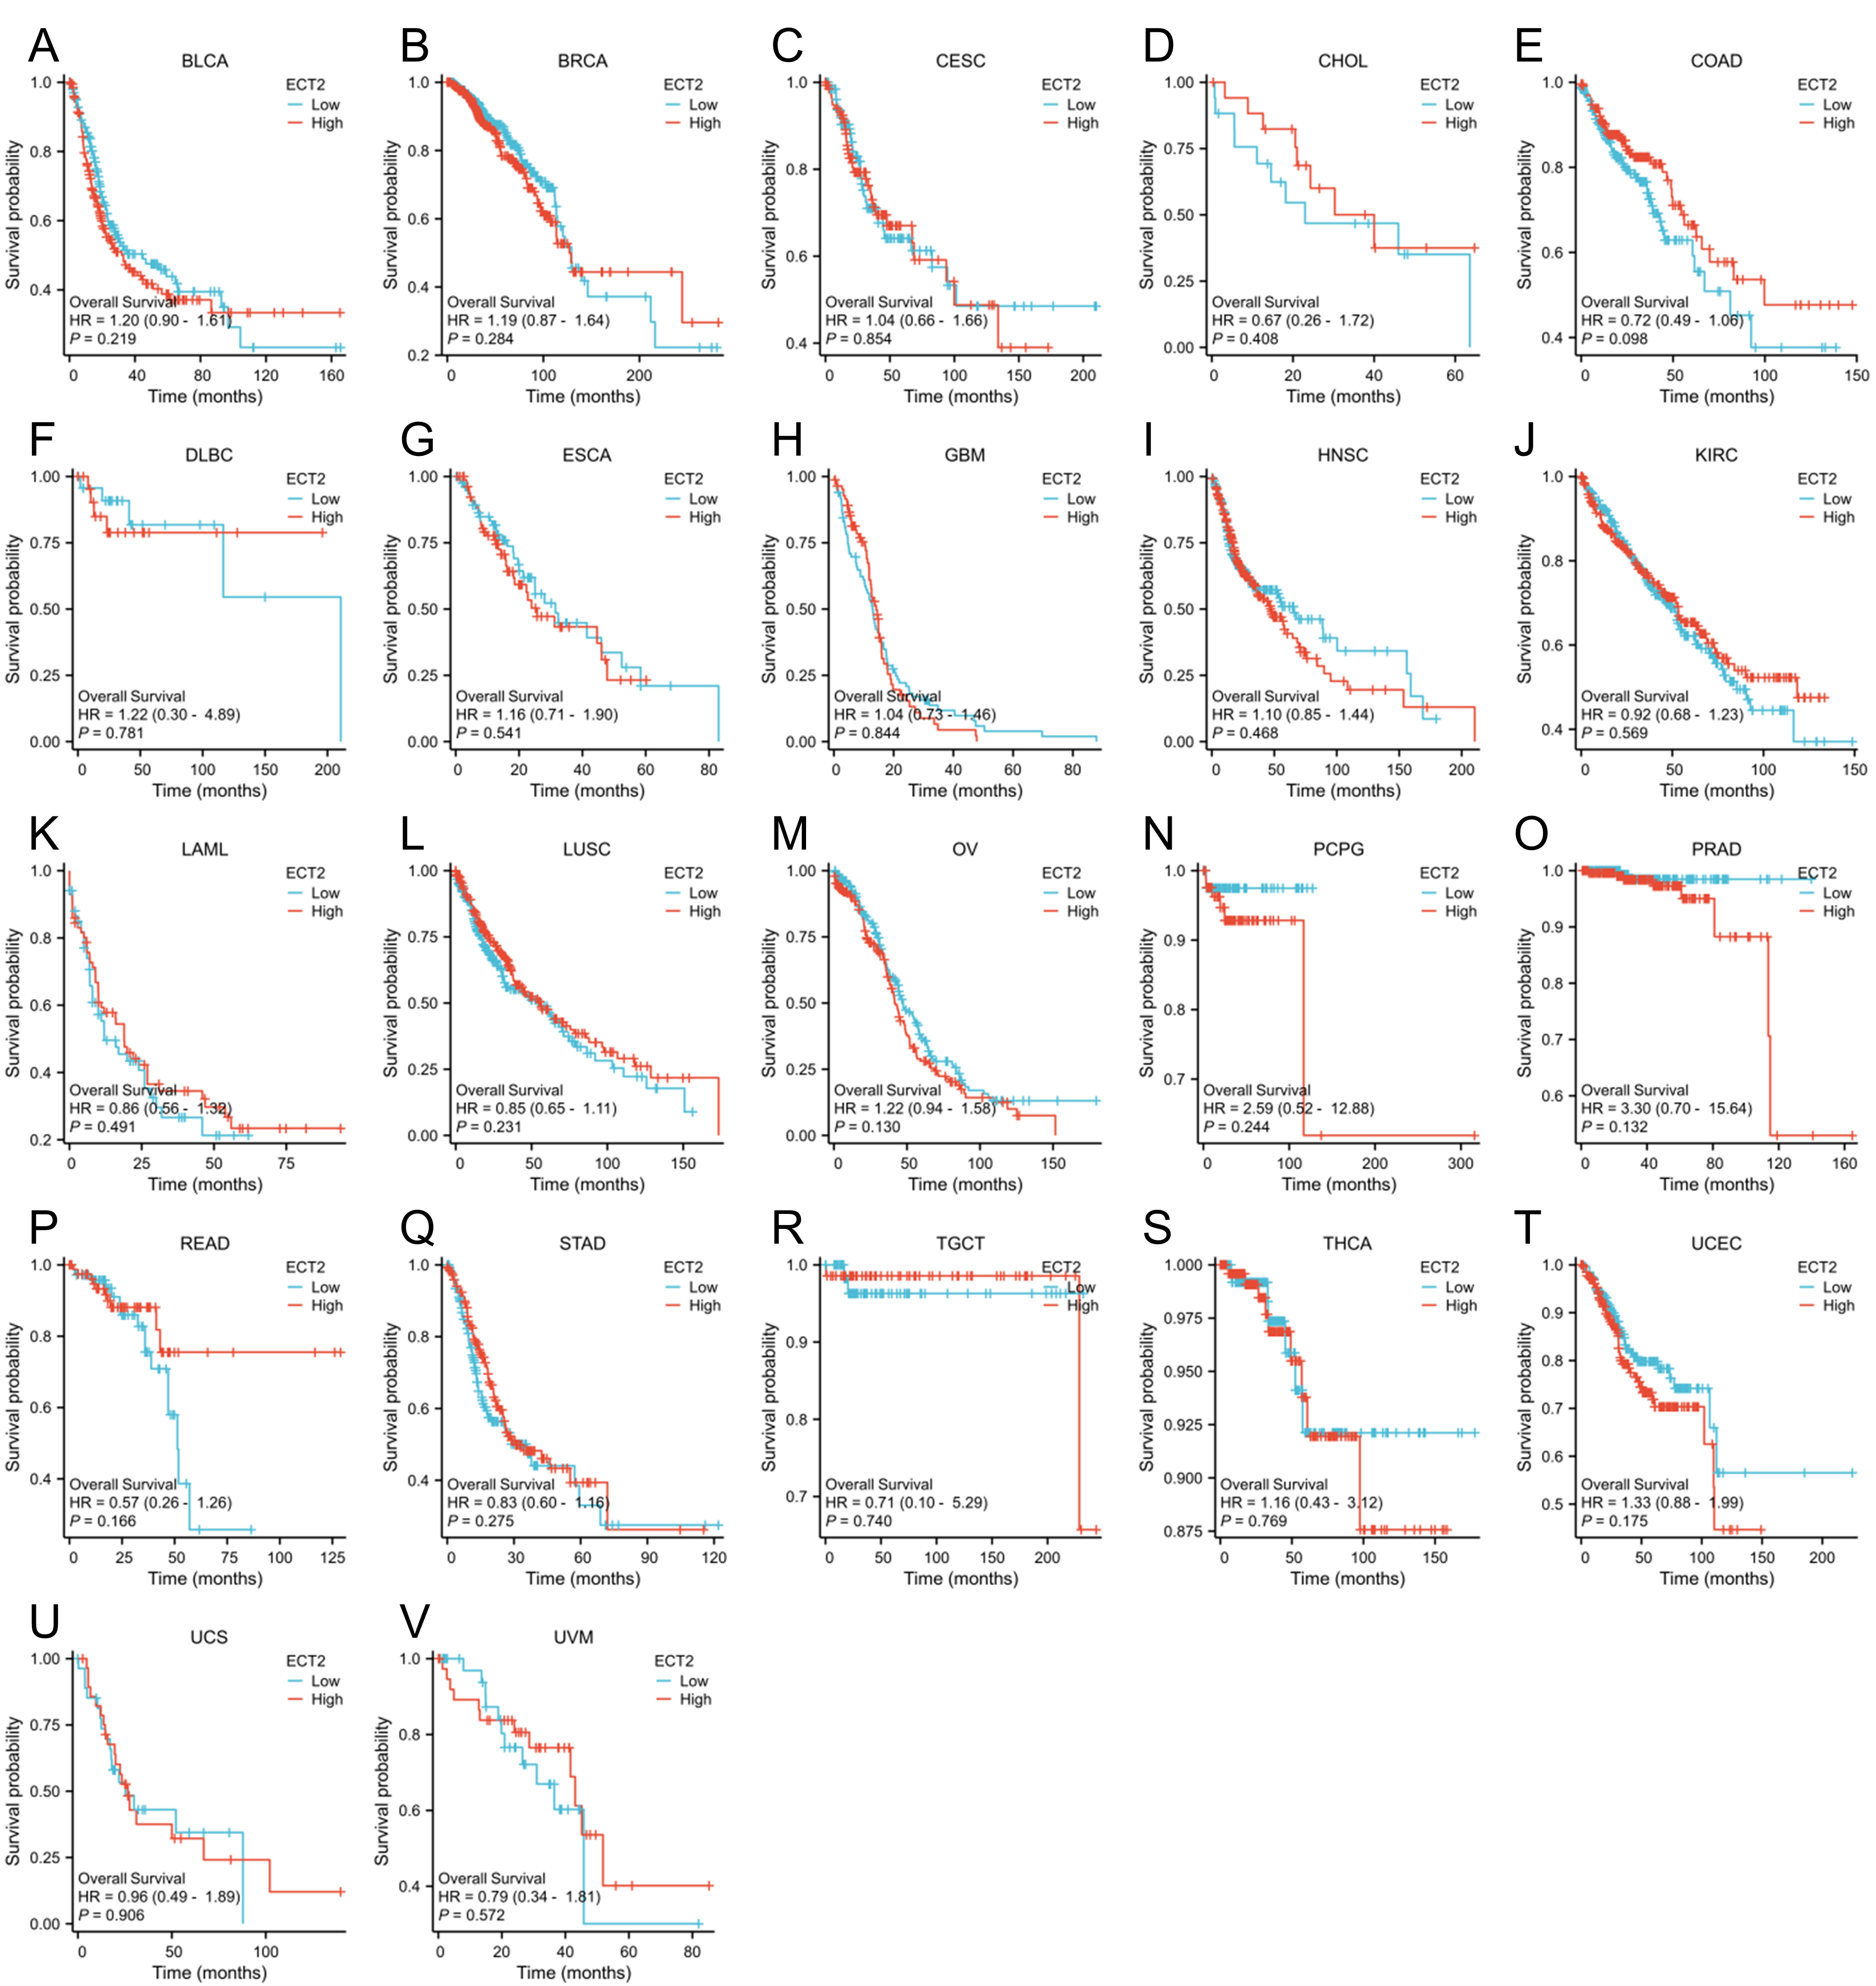
**

**Supplementary figure 6.** Kaplan-Meier analysis of the association between ECT2 expression and OS

(A) BLCA; (B) BRCA; (C) CESC; (D) CHOL; (E) COAD; (F) DLBC; (G)ESCA; (H)GBM; (I)HNSC; (J) KIRC; (K)LAML; (L) LUSC; (M)OV; (N)PCPG; (O)PRAD (P)READ; (Q) STAD; (R)TGCT; (S) THCA; (T)UCEC; (U)UCS; (V) UVM.
